1 Interchangeability of Periplasmic Adaptor Proteins AcrA and  
2 AcrE in forming functional efflux pumps with AcrD in *Salmonella*  
3 Typhimurium

4 Ilyas Alav<sup>1</sup>, Vassiliy N. Bavro<sup>2</sup>, Jessica M. A. Blair<sup>1\*</sup>

5

6 <sup>1</sup>Institute of Microbiology and Infection, University of Birmingham, Edgbaston,  
7 Birmingham, B15 2TT, United Kingdom

8 <sup>2</sup>School of Life Sciences, University of Essex, Colchester, CO4 3SQ, United  
9 Kingdom

10

11 \*Corresponding author

12 E-mail: [j.m.a.blair@bham.ac.uk](mailto:j.m.a.blair@bham.ac.uk)

13 Tel: +44 (0)121 414 7606

14

15 Running title: AcrD can function with AcrA or AcrE

16

17

18

19

20

21

22

23

24

25

26

27

28

29 **Abstract**

30 **Background**

31 RND efflux pumps are important mediators of antibiotic resistance. RND pumps  
32 including the principal multidrug-efflux pump AcrAB-TolC in *Salmonella*, are tripartite  
33 systems, with an inner membrane RND-transporter, a periplasmic adaptor protein  
34 (PAP) and an outer membrane factor (OMF). We previously identified the residues  
35 required for binding between the PAP AcrA and the RND-transporter AcrB and have  
36 demonstrated that PAPs can function with non-cognate transporters. AcrE and  
37 AcrD/AcrF are homologues of AcrA and AcrB, respectively. Here, we show that AcrE  
38 can interact with AcrD, which does not possess its own PAP, and establish that the  
39 residues previously identified in AcrB-binding are also involved in AcrD-binding.

40

41 **Methods**

42 The *acrD* and *acrE* genes were expressed into a strain lacking *acrABDEF* ( $\Delta$ 3RND).  
43 PAP residues involved in promiscuous interactions were predicted based on  
44 previously defined PAP-RND interactions and corresponding mutations generated in  
45 *acrA* and *acrE*. Antimicrobial susceptibility of the mutant strains was determined.

46

47 **Results**

48 Co-expression of *acrD* and *acrE* significantly decreased susceptibility of the  $\Delta$ 3RND  
49 strain to AcrD substrates showing that AcrE can form a functional complex with  
50 AcrD. The substrate profile of *Salmonella* AcrD differed from that of *E. coli* AcrD.  
51 Mutations targeting the previously defined PAP-RND interaction sites in AcrA/AcrE  
52 impaired efflux of AcrD-dependent substrates.

53

54 **Conclusions**

55 These data indicate that AcrE forms an efflux-competent pump with AcrD and thus  
56 presents an alternative PAP for this pump. Mutagenesis of the conserved  
57 RND-binding sites validates the interchangeability of AcrA and AcrE, highlighting  
58 them as potential drug targets for efflux inhibition.

59

60

61

62

63

64

65

66

67

68

69

70

71

72

73

74

75

76

77

78

## 79 **Introduction**

80 Multidrug-resistance (MDR) efflux pumps play a major role in antibiotic resistance of  
81 bacteria by reducing the intracellular concentration of drugs<sup>1, 2</sup>. In particular, the  
82 Resistance-Nodulation-Division (RND) family of efflux pumps contribute to clinically  
83 relevant antibiotic resistance in Gram-negative bacteria, such as *Salmonella*  
84 *enterica*<sup>3-6</sup>. Tripartite RND pumps span the double membrane of Gram-negative  
85 bacteria and consist of an inner membrane RND-transporter, a periplasmic adaptor  
86 protein (PAP) and an outer membrane factor (OMF)<sup>7-9</sup>. Owing to their unique  
87 organisation, tripartite efflux pumps can directly export drugs across the outer  
88 membrane to the extracellular environment. The majority of RND pumps exhibit a  
89 broad substrate profile, which includes multiple classes of antibiotics, biocides,  
90 detergents, dyes and metals<sup>10, 11</sup>. Furthermore, there is increasing evidence that  
91 RND pumps also play a role in various biological processes and behaviours,  
92 including biofilm formation, detoxification, quorum sensing and virulence<sup>12-14</sup>.

93

94 In *S. enterica*, five RND pumps have been characterised: AcrAB, AcrD, AcrEF,  
95 MdtABC and MdsABC<sup>5</sup>. The AcrAB pump is constitutively expressed in *S. enterica*  
96 and displays a remarkably wide substrate profile, consisting of multiple classes of  
97 antibiotics, bile salts, detergents and dyes<sup>5</sup>. The AcrEF system possesses a similar  
98 substrate profile to AcrAB but is not constitutively expressed<sup>5, 15</sup>. In *S. enterica*, AcrB  
99 is 80% identical to AcrF, whereas AcrD is 64% and 65% identical to AcrB and AcrF,  
100 respectively<sup>16, 17</sup>. This sequence divergence is reflected in the substrate profile of  
101 AcrD, which exhibits markedly narrower substrate range compared to AcrB and  
102 AcrF. In *Escherichia coli*, AcrD has been shown to export aminoglycosides and  
103 anionic  $\beta$ -lactams<sup>18-20</sup>. Compared to AcrB, AcrD has a stronger preference for

104 anionic  $\beta$ -lactams, which is linked to differences in the access binding pocket<sup>21</sup>.  
105 Homology modelling of *E. coli* AcrD combined with molecular dynamic simulations  
106 have also suggested that the different substrate specificities between AcrB and AcrD  
107 stem from the corresponding differences in the physicochemical and topological  
108 properties of their binding pockets<sup>22</sup>. Until now, this view of AcrD substrate selectivity  
109 has been assumed to also apply to the AcrD pump in *S. enterica*.

110

111 In *Salmonella*, most of the RND pumps require the OMF TolC to form a functional  
112 tripartite complex, the exception being MdsABC, which can function with either MdsC  
113 or TolC<sup>23</sup>. The RND-transporter genes are usually co-located with their cognate PAP  
114 on a single operon. In *S. enterica* there are four RND-associated PAPs: AcrA, AcrE,  
115 MdtA and MdsA<sup>5</sup>. Based on sequence analyses and structural alignments, AcrA and  
116 AcrE have been shown to be the most closely related, with a sequence identity of  
117 69.3% over their first 374 residues as calculated by Expasy SIM server<sup>24</sup>, and just a  
118 single gap in the alignment of this region, which maps to the signal sequence and  
119 does not impact the mature protein. Correspondingly, AcrA and AcrE share a  
120 predicted secondary structure (Fig. 1a)<sup>25</sup>, which is also nearly identical to that of the  
121 experimentally determined structure of the AcrA from *E. coli*, with the exception of the  
122 divergent C-terminal region, which is predicted to be disordered and is not seen in  
123 the available cryo-EM structures<sup>8,9</sup>. This allows creation of reliable homology models  
124 of AcrE, which we have previously reported<sup>25</sup>. In contrast to AcrA and AcrE, both  
125 MdtA and MdsA are more sequentially divergent, with MdsA sharing less than 30%  
126 identity with AcrA and AcrE, which is predicted to also translate in differences into  
127 significant differences 3D structure<sup>5</sup>.

128

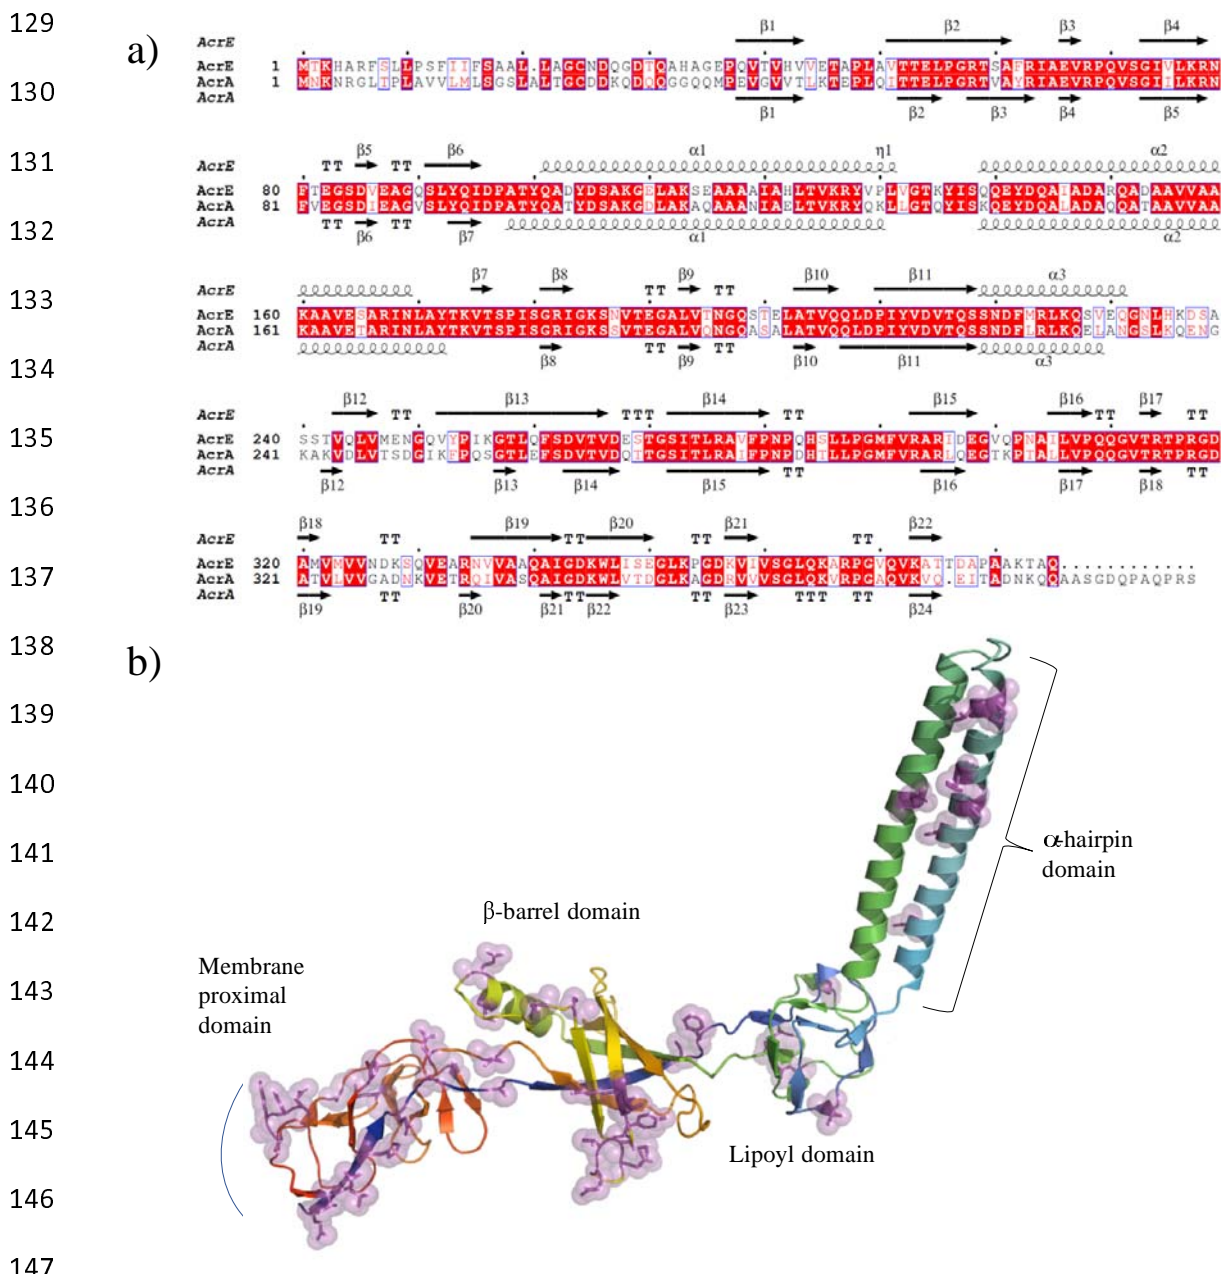

148 **Figure 1. a)** A pairwise sequence alignment of AcrA and AcrE of *S. enterica*  
 149 highlighting their predicted close structural homology. The top secondary structure is  
 150 derived from the previously reported homology model of AcrE<sup>25</sup>, while the bottom  
 151 secondary structure corresponds to the experimental AcrA structure from *E. coli*  
 152 (PDB ID 5O66; chain G), which has no sequence gaps with the AcrA of *S. enterica*.  
 153 **b)** Mapping the sequence differences between the *Salmonella* AcrE and AcrA, onto

154 the homology model of the AcrE<sup>25</sup>. The non-conserved substitutions are shown in  
155 sidechain and semi-transparent sphere representation. The mapping demonstrates  
156 that the bulk of the discrepancies, which may be expected to account for the  
157 functional differences between the PAPs map to their beta-barrel and membrane-  
158 proximal domains.

159

160 Although AcrA is the cognate PAP for AcrB, the RND pump AcrD was shown to  
161 depend on AcrA to form a functional tripartite efflux system since it lacks is not  
162 encoded with its own PAP<sup>26</sup>. Indeed, AcrA has been reported to also function with  
163 AcrF in *E. coli*<sup>27</sup> and recently, AcrE has been demonstrated to function with AcrB in  
164 *S. Typhimurium*<sup>25</sup>.

165

166 The major RND-transporter binding residues of AcrA have been highlighted by  
167 cryogenic electron microscopy structural studies<sup>8, 9</sup> and validated by mutagenesis<sup>25</sup>.  
168 Our comparative analysis of *Salmonella* PAPs demonstrated that these critical  
169 residues fall within a discrete number of linear sequence sites, which we termed  
170 RND-binding boxes<sup>25</sup>. These are shared between AcrA and AcrE, potentially  
171 explaining their interchangeability<sup>25</sup>. However, MdtA and MdsA are not  
172 interchangeable and cannot function with non-cognate RND-transporters and  
173 correspondingly are significantly different within RND-binding boxes<sup>25</sup>. Although AcrA  
174 and AcrE have been shown to be largely interchangeable, the ability of AcrE to  
175 function with AcrD remains unknown.

176

177 Here, we have investigated the substrate specificity of *S. Typhimurium* SL1344  
178 AcrD. We furthermore explored whether the interoperability of AcrA and AcrE

179 extends to the RND-transporter AcrD and whether this interaction is driven by the  
180 same residues that have been shown to be important for other PAP-RND  
181 combinations.

182

## 183 **Materials and methods**

### 184 **Bacterial strains**

185 All strains used in this study are listed in Table 1. The *Salmonella enterica* serovar  
186 Typhimurium strains were derived from the wild-type strain SL1344 (henceforth  
187 referred to as *S. Typhimurium*), a pathogenic strain first isolated from an  
188 experimentally infected calf<sup>28</sup>. All strains were grown in Luria–Bertani (LB) broth at  
189 37°C with aeration.

190

### 191 **Construction of gene deletion mutants**

192 The  $\Delta$ *acrB* mutant strain was constructed previously<sup>29</sup>. All other mutant strains were  
193 constructed using the  $\lambda$  red recombinase system described previously, antibiotic  
194 markers were removed, and the process repeated to make double and triple  
195 knockout *S. Typhimurium* SL1344 strains (Table 1)<sup>30</sup>. All the primers used for  
196 generating gene knockouts and cloning are listed in Table S1.

197

### 198 **Plasmid construction**

199 All plasmids used in this study are listed in Table 1. The *acrD* and *acrA* genes were  
200 amplified from *S. Typhimurium* SL1344 by PCR and cloned into pHSG398 and  
201 pACYC177 plasmids, respectively, as described previously<sup>26</sup>. Expression of the *acrE*  
202 gene is repressed by H-NS<sup>15</sup>. Therefore, to clone *acrE* into pACYC177 and obtain  
203 sufficient expression, a forward primer was designed containing the *trc* promoter and



204 the *acrE* ribosomal binding site (Table S1). The synthetic *trc* promoter is derived  
205 from the *E. coli trp* and *lacUV5* promoters that drives high level of transcription<sup>31</sup>.

206

207 The *acrE* gene was amplified from *S. Typhimuirum* SL1344 genomic DNA by PCR  
208 using the *acrE* cloning F and R primers (Table S1), which introduced *Scal*  
209 and *Bam*HI sites, respectively. The PCR fragment contained the *trc* promoter and a  
210 region 14 base pairs upstream to 2 base pairs downstream of *acrE*. This fragment  
211 was digested with *Scal* and *Bam*HI and cloned into the corresponding sites of  
212 pACYC177, where an ampicillin resistance gene was located. The resulting plasmid  
213 pACYC177 *acrE* solely possessed a kanamycin resistance marker. The control  
214 pACYC177Kan<sup>R</sup> plasmid was constructed as described previously<sup>26</sup>.

215

#### 216 **Construction of mutant *pacrA* and *pacrE* plasmids**

217 The *acrA* and *acrE* point mutants were generated using the GeneArt<sup>®</sup> Gene  
218 Synthesis Service (Invitrogen, Germany) and subsequently cloned into the  
219 pACYC177 plasmid using the Subcloning Service (Invitrogen, Germany). All  
220 plasmids were sequenced to check for the presence of the desired point mutations  
221 and to ensure there were no unwanted secondary mutations.

222

#### 223 **Determination of antimicrobial susceptibility**

224 The minimum inhibitory concentration (MIC) of various antimicrobials was  
225 determined using the agar dilution method according to CLSI guidance<sup>32</sup>.

226

227

228

229 **Table 1. List of *S. enterica* serovar Typhimurium strains and plasmids used in**  
 230 **this study.**

| Strain/<br>plasmid       | Genotype/characteristic                                                                    | Source/reference |
|--------------------------|--------------------------------------------------------------------------------------------|------------------|
| <b>Strains</b>           |                                                                                            |                  |
| SE01                     | Wild-type <i>S. Typhimurium</i> SL1344                                                     | <sup>28</sup>    |
| SE02                     | $\Delta$ <i>acrB</i>                                                                       | <sup>29</sup>    |
| SE446                    | $\Delta$ <i>acrB</i> /pHSG398                                                              | This study       |
| SE449                    | $\Delta$ <i>acrB</i> /p <i>acrD</i>                                                        | This study       |
| SE379                    | $\Delta$ <i>acrD</i>                                                                       | This study       |
| SE502                    | $\Delta$ <i>acrAB</i> $\Delta$ <i>acrD</i> $\Delta$ <i>acrEF</i> ( $\Delta$ 3RND)          | This study       |
| SE544                    | $\Delta$ 3RND/pHSG398                                                                      | This study       |
| SE545                    | $\Delta$ 3RND/pACYC177Kan <sup>R</sup>                                                     | This study       |
| SE507                    | $\Delta$ 3RND/p <i>acrD</i>                                                                | This study       |
| SE510                    | $\Delta$ 3RND/p <i>acrA</i>                                                                | This study       |
| SE511                    | $\Delta$ 3RND/p <i>acrE</i>                                                                | This study       |
| SE506                    | $\Delta$ 3RND/pACYC177Kan <sup>R</sup> + pHSG398                                           | This study       |
| SE548                    | $\Delta$ 3RND/pACYC177Kan <sup>R</sup> + p <i>acrD</i>                                     | This study       |
| SE508                    | $\Delta$ 3RND/p <i>acrD</i> + p <i>acrA</i>                                                | This study       |
| SE509                    | $\Delta$ 3RND/p <i>acrD</i> + p <i>acrE</i>                                                | This study       |
| SE546                    | $\Delta$ 3RND/pHSG398 + p <i>acrA</i>                                                      | This study       |
| SE547                    | $\Delta$ 3RND/pHSG398 + p <i>acrE</i>                                                      | This study       |
| SE553                    | $\Delta$ 3RND/pHSG398 + p <i>acrA</i> F292G                                                | This study       |
| SE554                    | $\Delta$ 3RND/pHSG398 + p <i>acrA</i> G363F                                                | This study       |
| SE554                    | $\Delta$ 3RND/pHSG398 + p <i>acrE</i> F291G                                                | This study       |
| SE556                    | $\Delta$ 3RND/pHSG398 + p <i>acrE</i> G362F                                                | This study       |
| SE557                    | $\Delta$ 3RND/p <i>acrD</i> + p <i>acrA</i> F292G                                          | This study       |
| SE558                    | $\Delta$ 3RND /p <i>acrD</i> + p <i>acrA</i> G363F                                         | This study       |
| SE559                    | $\Delta$ 3RND/p <i>acrD</i> + p <i>acrE</i> F291G                                          | This study       |
| SE560                    | $\Delta$ 3RND/p <i>acrD</i> + p <i>acrE</i> G362F                                          | This study       |
| <b>Plasmids</b>          |                                                                                            |                  |
| pACYC177                 | vector; Amp <sup>R</sup> , Kan <sup>R</sup>                                                | ATCC             |
| pACYC177Kan <sup>R</sup> | vector; Kan <sup>R</sup>                                                                   | This study       |
| pHSG398                  | vector; Chl <sup>R</sup>                                                                   | Takara Bio Group |
| p <i>acrA</i>            | SL1344 <i>acrA</i> gene cloned into pACYC177; Kan <sup>R</sup>                             | This study       |
| p <i>acrE</i>            | SL1344 <i>acrE</i> gene cloned into pACYC177; Kan <sup>R</sup>                             | This study       |
| p <i>acrD</i>            | SL1344 <i>acrD</i> gene cloned into pHSG398; Chl <sup>R</sup>                              | This study       |
| p <i>acrA</i> F292G      | SL1344 <i>acrA</i> gene with a F292G point mutation cloned into pACYC177; Kan <sup>R</sup> | This study       |
| p <i>acrA</i> G363F      | SL1344 <i>acrA</i> gene with a G363F point mutation cloned                                 | This study       |

|                    |                                                                                            |            |
|--------------------|--------------------------------------------------------------------------------------------|------------|
|                    | into pACYC177; Kan <sup>R</sup>                                                            |            |
| <i>pacrE</i> F291G | SL1344 <i>acrE</i> gene with a F291G point mutation cloned into pACYC177; Kan <sup>R</sup> | This study |
| <i>pacrE</i> G362F | SL1344 <i>acrE</i> gene with a G362F point mutation cloned into pACYC177; Kan <sup>R</sup> | This study |

231 Amp<sup>R</sup>, ampicillin resistant; Chl<sup>R</sup>, chloramphenicol resistant; Kan<sup>R</sup>, kanamycin  
232 resistant

233

## 234 **Results and discussion**

### 235 **AcrD of *S. Typhimurium* SL1344 does not transport aminoglycosides**

236 Despite being isolated several decades ago<sup>33</sup>, the substrate specificity of AcrD  
237 remains relatively poorly characterised experimentally. Therefore, an additional  
238 rationale of this study was to investigate the substrate specificity of *S. Typhimurium*  
239 SL1344 AcrD, especially in the context of PAP-RND interactions, which may provide  
240 modulatory effects on the specificity of the pump. Previously, it has been reported  
241 that *E. coli* AcrD exports aminoglycosides<sup>19, 20</sup>. However, there is a lack of  
242 experimental evidence in *Salmonella* and most of the features of *Salmonella* AcrD  
243 are inferred based on close sequence similarity to *E. coli* AcrD (97.4%, Fig. S1).  
244 While, some previous work has addressed this, aminoglycosides have not been  
245 specifically investigated<sup>5, 17</sup>. Therefore, we investigated the substrate range of AcrD  
246 in *S. Typhimurium* SL1344.

247

248 The  $\Delta$ *acrD* SL1344 strain did not exhibit any significant increase in susceptibility to  
249 any of the antimicrobials tested as previously reported<sup>17</sup>. This is likely because  
250 expression of *acrD* is generally low in laboratory conditions and for many  
251 compounds, any effect would be masked by the presence of AcrB<sup>17</sup>. Therefore,  
252 *pacrD* was transformed into the  $\Delta$ *acrB* strain, and the effect of *acrD* overexpression

253 on antimicrobial susceptibility of the resulting transformant was determined. The  
254  $\Delta acrB/pacrD$  strain displayed significantly increased MIC values to reported AcrD-  
255 substrates aztreonam, carbenicillin, cloxacillin, fusidic acid, nafcillin, novobiocin and  
256 oxacillin (Table 2) consistent with previous studies<sup>26</sup>, suggesting that protein is  
257 functionally expressed and incorporated into the membrane. Surprisingly, the  
258 introduction of *acrD* into  $\Delta acrB$  ( $\Delta acrB/pacrD$ ) strain did not result in a significant  
259 increase in MICs to the aminoglycosides kanamycin, gentamicin, spectinomycin or  
260 streptomycin (Table 2), implying that AcrD is not measurably contributing to  
261 aminoglycoside efflux. This is in contrast to the reported role of AcrD in the  
262 aminoglycoside resistance of *E. coli*, wherein deletion of *acrD* was shown to  
263 decrease aminoglycoside MICs by two to eight fold<sup>19</sup> and expression of *acrD* from a  
264 plasmid in an *acrB::aph*  $\Delta acrD$  strain increased aminoglycoside MICs by two fold<sup>34</sup>. In  
265 agreement with our findings, the AcrD efflux pump of the Gram-negative plant  
266 pathogen *Erwinia amylovora* has also been reported to not play a role in  
267 aminoglycoside resistance<sup>35</sup>. Similarly, our data shows that the AcrD efflux pump of  
268 *S. Typhimurium* SL1344 does not seem to be involved in aminoglycoside export as  
269 previously assumed.

270

271 A possible explanation for the differences in the substrate profiles of AcrD between  
272 *E. coli* and *S. Typhimurium* could be the observed discrepancy between the residues  
273 in their respective access and deep binding pockets (Fig. S1). Due to the lack of  
274 experimental AcrD structure, the functional significance of the residues of the  
275 respective drug binding pockets of AcrD is inferred from their positional homology  
276 with corresponding AcrB residues, structures of which have been experimentally  
277 defined for both *E. coli*<sup>36-38</sup>, and more recently for *Salmonella*<sup>39</sup>. Specifically, the

278 presence of a serine in the deep binding pocket of *S. Typhimurium* AcrD at position  
279 610, which in *E. coli* AcrD is occupied by an alanine, could possibly impact the  
280 previously described lipophilic character of the drug binding cavity<sup>22</sup>. There are also  
281 two additional discrepancies which could be seen as non-conservative substitutions,  
282 namely that of *E. coli* AcrD isoleucine to a phenylalanine at position 633 (I633F) in *S.*  
283 *Typhimurium*, and leucine to a glutamine at position 565 (L565Q), both of which are  
284 likely to cause steric hinderance and impact the electrostatics of the access binding  
285 pocket, respectively<sup>21, 22</sup>. These subtle differences may account for the notable  
286 differences in substrate recognition by AcrD between the two species.

287

#### 288 **AcrE forms a functional PAP-RND pair with AcrD**

289 AcrD has been previously shown to depend on AcrA to function as an efflux  
290 system<sup>26</sup>. Therefore, owing to the high similarity of the predicted RND-binding sites  
291 between the PAPs AcrA and AcrE<sup>25, 40</sup>, we hypothesised that AcrE should also  
292 function with AcrD. To test this, we deleted the *acrAB*, *acrD* and *acrEF* genes in *S.*  
293 *Typhimurium* SL1344 to give a strain without active RND-dependent efflux, as  
294 indicated by significantly increased susceptibility to AcrB-, AcrF-, and AcrD-  
295 substrates (Table 2 and S2). The MdtABC and MdsABC systems are much less  
296 similar to the three AcrB/AcrD/AcrF-based systems and play a minor role in  
297 resistance. Consistent with this, they are not expressed under standard laboratory  
298 conditions<sup>5</sup> and furthermore their inactivation did not have any additive effect on  
299 antimicrobial susceptibility<sup>5, 25</sup>. Hence, these systems were not inactivated.

300

301 Firstly, we validated the previously reported AcrA dependency of AcrD in *S.*  
302 *Typhimurium* SL1344<sup>26</sup>. The *pacrA* and *pacrD* plasmids were co-transformed into the

303  $\Delta$ 3RND strain, and the antimicrobial susceptibility of the resulting transformant was  
304 determined. We found that co-expression of *acrA* and *acrD* in the  $\Delta$ 3RND strain  
305 significantly decreased susceptibility to known AcrD-substrates aztreonam,  
306 carbenicillin, cloxacillin, fusidic acid, nafcillin, novobiocin, oxacillin and ticarcillin  
307 (Table 2).

308

309 Secondly, to determine whether AcrE and AcrD form a functional complex together,  
310 *pacrD* and *pacrE* were co-transformed into the  $\Delta$ 3RND strain and the susceptibility to  
311 validated AcrD-substrates was tested. Co-expression of *acrE* and *acrD* in the  
312  $\Delta$ 3RND strain significantly increased the MICs of aztreonam, carbenicillin, cloxacillin,  
313 fusidic acid, nafcillin, novobiocin, oxacillin and ticarcillin (Table 2). There was no  
314 difference in MIC values between co-expressing *acrD* with *acrA* or *acrE*, which  
315 demonstrates the full interchangeability of the two PAPs (Table 2). Furthermore, co-  
316 expression of either *acrE* and *acrD* or *acrA* and *acrD* in the  $\Delta$ 3RND strain did not  
317 increase MIC values to the tested AcrB-substrates (i.e., acriflavine, crystal violet,  
318 ethidium bromide, erythromycin, methylene blue, rhodamine 6G and tetracycline)<sup>5</sup>,  
319 clearly showing AcrD-mediated efflux (Table S2). Overexpression of either *acrD* or  
320 *acrE* alone in the  $\Delta$ 3RND strain did not significantly increased MIC values to the  
321 AcrD-substrates tested (Table 2), signifying that AcrE requires the presence of AcrD  
322 to form a functional, efflux-competent complex.

323

324 Our data suggests interchangeability between AcrA and AcrE in *S. Typhimurium*  
325 SL1344. One possible explanation for the interoperability between AcrA and AcrE is  
326 that the latter may function as a backup PAP for when AcrA function is impaired or  
327 lost. This idea is supported by evidence from studies that demonstrated that in *S.*

328 Typhimurium, in the absence of *acrA*, it was possible to select for *acrE*  
329 overexpression<sup>25 41</sup>. Another study demonstrated that in the absence of *acrA* and  
330 *acrE*, it is possible to restore the phenotypic defect in active efflux by complementing  
331 with either *acrA* or *acrE*<sup>40</sup>.

332

### 333 **Disruption of the RND-binding residues in AcrA or AcrE impairs AcrD-** 334 **mediated efflux of substrate drugs**

335 Previously, we showed that the promiscuity between *Salmonella* AcrA and AcrE in  
336 their ability to form a functional complex with AcrB stems from the highly conserved  
337 RND-binding sites (termed RND-binding boxes) between these two PAPs.  
338 Specifically, within the *Salmonella* AcrA, we identified several residues mapping to  
339 the  $\beta$ -barrel and membrane proximal domains that were important for AcrB-binding<sup>25</sup>.  
340 There, the disruption of the F292 or G363 residues in AcrA produced the most  
341 pronounced phenotypic effect, resulting in severely abrogated active efflux and  
342 significantly increased susceptibility to AcrB-substrates<sup>25</sup>. Therefore, to investigate  
343 whether these residues are also important for binding of the newly determined  
344 cognate PAPs to AcrD, the point mutation corresponding to F292G or G363F were  
345 constructed in both *pacrA* and *pacrE* (F291G and G362F) respectively and co-  
346 transformed with *pacrD* into the  $\Delta$ 3RND strain. Based on structural analysis, we  
347 chose F292G and G363F as target mutations due to their radical change of  
348 respective site-chain properties.

349

350 Consistent with the data obtained in coexpression with AcrB<sup>25</sup>, the disruption of F292  
351 or G363 in AcrA resulted in impaired AcrD-mediated efflux of AcrD-substrates,  
352 confirming that the same residues required for binding of AcrA to AcrB are also

353 required for its binding to AcrD (Table 2). These point mutations do not impact the  
354 protein levels and folding as previously demonstrated<sup>25</sup>. To determine whether the  
355 corresponding residues in AcrE are also important for AcrD-binding, F291 and G362  
356 were mutated (Fig. S2). As expected, the F291G or G362F point mutations in AcrE  
357 also impaired AcrD-mediated efflux in the  $\Delta 3RND$  strain (Table 2). These data  
358 suggest that the PAP-RND binding sites previously identified based upon AcrA-AcrB  
359 interaction, are indeed both sequentially and functionally conserved between AcrA  
360 and AcrE and account for the productive recognition and formation of functional  
361 tripartite pumps.

362

### 363 **Concluding remarks**

364 Here, we report that the PAP AcrE can form a functional complex with the RND-  
365 transporter AcrD, further validating the interchangeability between the homologous  
366 PAPs AcrA and AcrE. Furthermore, this interchangeability is likely to be due to the  
367 highly conserved and specific RND-binding sites between these two PAPs. Our  
368 report highlights the redundancy between these two PAPs must be taken into  
369 account when targeting them for efflux inhibition. Therefore, the residues we  
370 identified here could inform future design of effective efflux inhibitors targeting PAPs  
371 or tripartite complex assemblies.

372

373

374

375

376

377



378

379

380 **Table 2.** Susceptibility of *S. Typhimurium* strains to antimicrobials.

| Strain                                                                            | MIC (mg/L)  |          |           |            |           |          |           |           |      |     |     |     |
|-----------------------------------------------------------------------------------|-------------|----------|-----------|------------|-----------|----------|-----------|-----------|------|-----|-----|-----|
|                                                                                   | ATM         | CAR      | CXA       | FA         | NAF       | NOV      | OXA       | TIC       | GEN  | SPR | STR | KAN |
| Wild type SL1344                                                                  | 0.06        | 4        | 512       | 1024       | 1024      | 512      | 512       | 4         | 0.5  | 16  | 8   | 1   |
| $\Delta$ <i>acrB</i>                                                              | 0.06        | 1        | 4         | 4          | 8         | 2        | 4         | 1         | 0.25 | 16  | 8   | 1   |
| $\Delta$ <i>acrB</i> /pHSG398                                                     | 0.06        | 1        | 4         | 4          | 8         | 2        | 2         | 1         | 0.25 | 16  | 4   | 1   |
| $\Delta$ <i>acrB</i> / <i>pacrD</i>                                               | <b>0.25</b> | <b>8</b> | <b>16</b> | <b>64</b>  | <b>64</b> | <b>8</b> | <b>16</b> | <b>16</b> | 0.25 | 16  | 4   | 1   |
| $\Delta$ <i>acrD</i>                                                              | 0.06        | 4        | 512       | 1024       | 1024      | 512      | 512       | 4         | 0.5  | 16  | 4   | 1   |
| $\Delta$ <i>acrAB</i> $\Delta$ <i>acrD</i> $\Delta$ <i>acrEF</i> ( $\Delta$ 3RND) | 0.06        | 1        | 1         | 4          | 2         | 1        | 1         | 1         | 0.25 | 16  | 4   | 1   |
| $\Delta$ 3RND/pHSG398                                                             | 0.06        | 0.5      | 1         | 4          | 2         | 1        | 1         | 1         | 0.25 | 16  | 4   | 1   |
| $\Delta$ 3RND/pACYC177Kan <sup>R</sup>                                            | 0.06        | 1        | 1         | 4          | 2         | 1        | 1         | 1         | 0.5  | 16  | 4   | >32 |
| $\Delta$ 3RND/ <i>pacrD</i>                                                       | 0.06        | 0.5      | 1         | 4          | 2         | 1        | 1         | 1         | 0.25 | 16  | 4   | 1   |
| $\Delta$ 3RND/ <i>pacrA</i>                                                       | 0.06        | 1        | 1         | 4          | 2         | 1        | 1         | 1         | 0.5  | 16  | 4   | >32 |
| $\Delta$ 3RND/ <i>pacrE</i>                                                       | 0.06        | 1        | 1         | 4          | 2         | 1        | 1         | 1         | 0.5  | 16  | 4   | >32 |
| $\Delta$ 3RND/pACYC177Kan <sup>R</sup> + pHSG398                                  | 0.06        | 0.5      | 1         | 4          | 2         | 1        | 1         | 1         | 0.25 | 16  | 8   | >32 |
| $\Delta$ 3RND/pACYC177Kan <sup>R</sup> + <i>pacrD</i>                             | 0.06        | 1        | 1         | 4          | 2         | 1        | 1         | 1         | 0.25 | 16  | 4   | >32 |
| $\Delta$ 3RND/ <i>pacrD</i> + <i>pacrA</i>                                        | <b>0.25</b> | <b>8</b> | <b>16</b> | <b>128</b> | <b>32</b> | <b>8</b> | <b>16</b> | <b>8</b>  | 0.5  | 16  | 4   | >32 |
| $\Delta$ 3RND/ <i>pacrD</i> + <i>pacrE</i>                                        | <b>0.25</b> | <b>8</b> | <b>16</b> | <b>128</b> | <b>32</b> | <b>8</b> | <b>16</b> | <b>8</b>  | 0.5  | 16  | 4   | >32 |
| $\Delta$ 3RND/pHSG398 + <i>pacrA</i>                                              | 0.06        | 0.5      | 1         | 4          | 2         | 1        | 1         | 1         | 0.5  | 16  | 4   | >32 |
| $\Delta$ 3RND/pHSG398 + <i>pacrE</i>                                              | 0.06        | 0.5      | 1         | 4          | 2         | 1        | 1         | 1         | 0.5  | 16  | 4   | >32 |
| $\Delta$ 3RND/pHSG398 + F292G <i>acrA</i>                                         | 0.06        | 0.5      | 1         | 4          | 2         | 1        | 1         | 1         | 0.5  | 16  | 4   | >32 |
| $\Delta$ 3RND/pHSG398 + G363F <i>acrA</i>                                         | 0.06        | 0.5      | 1         | 4          | 2         | 1        | 1         | 1         | 0.5  | 16  | 4   | >32 |
| $\Delta$ 3RND/pHSG398 + F291G <i>acrE</i>                                         | 0.06        | 0.5      | 1         | 4          | 2         | 1        | 1         | 1         | 0.5  | 16  | 4   | >32 |
| $\Delta$ 3RND/pHSG398 + G362F <i>acrE</i>                                         | 0.06        | 0.5      | 1         | 4          | 2         | 1        | 1         | 1         | 0.5  | 16  | 4   | >32 |
| $\Delta$ 3RND/ <i>pacrD</i> + F292G <i>acrA</i>                                   | 0.06        | 0.5      | 1         | 4          | 2         | 1        | 1         | 1         | 0.5  | 16  | 4   | >32 |
| $\Delta$ 3RND/ <i>pacrD</i> + G363F <i>acrA</i>                                   | 0.06        | 1        | 1         | 4          | 2         | 1        | 1         | 1         | 0.25 | 16  | 4   | >32 |
| $\Delta$ 3RND/ <i>pacrD</i> + F291G <i>acrE</i>                                   | 0.06        | 0.5      | 1         | 4          | 2         | 1        | 1         | 1         | 0.25 | 16  | 4   | >32 |
| $\Delta$ 3RND/ <i>pacrD</i> + G362F <i>acrE</i>                                   | 0.06        | 1        | 1         | 4          | 2         | 1        | 1         | 1         | 0.25 | 16  | 4   | >32 |

381 ATM, aztreonam; CAR, carbenicillin; CXA, cloxacillin; FA, fusidic acid; GEN, gentamicin;

382 KAN, kanamycin; NAF, nafcillin; NOV, novobiocin; SPR, spectinomycin, STR, streptomycin, TIC,

383 ticarcillin

384 Values in bold indicate a significant increase (>2-fold) than those of their corresponding parental

385 strains.

386

387

388

389

390

### 391 **Funding**

392 IA was funded by the MIBTP2 BBSRC BB/M01116X/1 at the University of

393 Birmingham. VNB was supported by funding from BBSRC grant BB/N002776/1. JB

394 was funded by the BBSRC grant BB/M02623X/1 (David Phillips Fellowship to JB).

395

### 396 **Transparency declaration**

397 None to declare.

398

### 399 **References**

400 1. Webber MA, Piddock LJ. The importance of efflux pumps in bacterial

401 antibiotic resistance. *J Antimicrob Chemother* 2003; **51**: 9-11.

402 2. Blair JM, Webber MA, Baylay AJ et al. Molecular mechanisms of antibiotic

403 resistance. *Nat Rev Microbiol* 2015; **13**: 42-51.

404 3. Piddock LJ, White DG, Gensberg K et al. Evidence for an efflux pump

405 mediating multiple antibiotic resistance in *Salmonella enterica* serovar Typhimurium.

406 *Antimicrob Agents Chemother* 2000; **44**: 3118-21.

407 4. Du D, Wang-Kan X, Neuberger A et al. Multidrug efflux pumps: structure,

408 function and regulation. *Nat Rev Microbiol* 2018; **16**: 523-39.

409 5. Nishino K, Latifi T, Groisman EA. Virulence and drug resistance roles of

410 multidrug efflux systems of *Salmonella enterica* serovar Typhimurium. *Mol Microbiol*

411 2006; **59**: 126-41.

- 412 6. Colclough AL, Alav I, Whittle EE et al. RND efflux pumps in Gram-negative  
413 bacteria; regulation, structure and role in antibiotic resistance. *Future Microbiol* 2020;  
414 **15**: 143-57.
- 415 7. Symmons MF, Marshall RL, Bavro VN. Architecture and roles of periplasmic  
416 adaptor proteins in tripartite efflux assemblies. *Front Microbiol* 2015; **6**: 513.
- 417 8. Du D, Wang Z, James NR et al. Structure of the AcrAB-TolC multidrug efflux  
418 pump. *Nature* 2014; **509**: 512-5.
- 419 9. Wang Z, Fan G, Hryc CF et al. An allosteric transport mechanism for the  
420 AcrAB-TolC multidrug efflux pump. *Elife* 2017; **6**.
- 421 10. Nikaido H, Takatsuka Y. Mechanisms of RND multidrug efflux pumps.  
422 *Biochim Biophys Acta* 2009; **1794**: 769-81.
- 423 11. Li XZ, Plesiat P, Nikaido H. The challenge of efflux-mediated antibiotic  
424 resistance in Gram-negative bacteria. *Clin Microbiol Rev* 2015; **28**: 337-418.
- 425 12. Alav I, Sutton JM, Rahman KM. Role of bacterial efflux pumps in biofilm  
426 formation. *J Antimicrob Chemother* 2018; **73**: 2003-20.
- 427 13. Piddock LJ. Multidrug-resistance efflux pumps - not just for resistance. *Nat*  
428 *Rev Microbiol* 2006; **4**: 629-36.
- 429 14. Teelucksingh T, Thompson LK, Cox G. The evolutionary conservation of  
430 *Escherichia coli* drug efflux pumps supports physiological functions. *J Bacteriol* 2020.
- 431 15. Nishino K, Hayashi-Nishino M, Yamaguchi A. H-NS modulates multidrug  
432 resistance of *Salmonella enterica* serovar Typhimurium by repressing multidrug  
433 efflux genes *acrEF*. *Antimicrob Agents Chemother* 2009; **53**: 3541-3.
- 434 16. Eaves DJ, Ricci V, Piddock LJ. Expression of *acrB*, *acrF*, *acrD*, *marA*, and  
435 *soxS* in *Salmonella enterica* serovar Typhimurium: role in multiple antibiotic  
436 resistance. *Antimicrob Agents Chemother* 2004; **48**: 1145-50.

- 437 17. Blair JM, Smith HE, Ricci V et al. Expression of homologous RND efflux pump  
438 genes is dependent upon AcrB expression: implications for efflux and virulence  
439 inhibitor design. *J Antimicrob Chemother* 2015; **70**: 424-31.
- 440 18. Nishino K, Yamada J, Hirakawa H et al. Roles of TolC-dependent multidrug  
441 transporters of *Escherichia coli* in resistance to beta-lactams. *Antimicrob Agents*  
442 *Chemother* 2003; **47**: 3030-3.
- 443 19. Rosenberg EY, Ma D, Nikaido H. AcrD of *Escherichia coli* is an  
444 aminoglycoside efflux pump. *J Bacteriol* 2000; **182**: 1754-6.
- 445 20. Aires JR, Nikaido H. Aminoglycosides are captured from both periplasm and  
446 cytoplasm by the AcrD multidrug efflux transporter of *Escherichia coli*. *J Bacteriol*  
447 2005; **187**: 1923-9.
- 448 21. Kobayashi N, Tamura N, van Veen HW et al. beta-Lactam selectivity of  
449 multidrug transporters AcrB and AcrD resides in the proximal binding pocket. *J Biol*  
450 *Chem* 2014; **289**: 10680-90.
- 451 22. Ramaswamy VK, Vargiu AV, Mallocci G et al. Molecular rationale behind the  
452 differential substrate specificity of bacterial RND multi-drug transporters. *Sci Rep*  
453 2017; **7**: 8075.
- 454 23. Horiyama T, Yamaguchi A, Nishino K. TolC dependency of multidrug efflux  
455 systems in *Salmonella enterica* serovar Typhimurium. *J Antimicrob Chemother* 2010;  
456 **65**: 1372-6.
- 457 24. Huang X, Miller W. A time-efficient, linear-space local similarity algorithm.  
458 *Advances in Applied Mathematics* 1991; **12**: 337-57.
- 459 25. McNeil HE, Alav I, Torres RC et al. Identification of binding residues between  
460 periplasmic adapter protein (PAP) and RND efflux pumps explains PAP-pump  
461 promiscuity and roles in antimicrobial resistance. *PLoS Pathog* 2019; **15**: e1008101.

- 462 26. Yamasaki S, Nagasawa S, Hayashi-Nishino M et al. AcrA dependency of the  
463 AcrD efflux pump in *Salmonella enterica* serovar Typhimurium. *J Antibiot (Tokyo)*  
464 2011; **64**: 433-7.
- 465 27. Kobayashi K, Tsukagoshi N, Aono R. Suppression of hypersensitivity of  
466 *Escherichia coli* *acrB* mutant to organic solvents by integrational activation of the  
467 *acrEF* operon with the IS1 or IS2 element. *J Bacteriol* 2001; **183**: 2646-53.
- 468 28. Wray C, Sojka WJ. Experimental *Salmonella* typhimurium infection in calves.  
469 *Res Vet Sci* 1978; **25**: 139-43.
- 470 29. Buckley AM, Webber MA, Cooles S et al. The AcrAB-TolC efflux system of  
471 *Salmonella enterica* serovar Typhimurium plays a role in pathogenesis. *Cell*  
472 *Microbiol* 2006; **8**: 847-56.
- 473 30. Datsenko KA, Wanner BL. One-step inactivation of chromosomal genes in  
474 *Escherichia coli* K-12 using PCR products. *Proc Natl Acad Sci U S A* 2000; **97**: 6640-  
475 5.
- 476 31. Tegel H, Ottosson J, Hober S. Enhancing the protein production levels in  
477 *Escherichia coli* with a strong promoter. *FEBS J* 2011; **278**: 729-39.
- 478 32. CLSI. *Performance standards for antimicrobial susceptibility testing, 30th*  
479 *edition*. Wayne, PA: Clinical and Laboratory Standards Institute 2020.
- 480 33. Ma D, Cook DN, Hearst JE et al. Efflux pumps and drug resistance in gram-  
481 negative bacteria. *Trends Microbiol* 1994; **2**: 489-93.
- 482 34. Elkins CA, Nikaido H. Substrate specificity of the RND-type multidrug efflux  
483 pumps AcrB and AcrD of *Escherichia coli* is determined predominantly by two large  
484 periplasmic loops. *J Bacteriol* 2002; **184**: 6490-8.

- 485 35. Pletzer D, Weingart H. Characterization of AcrD, a resistance-nodulation-cell  
486 division-type multidrug efflux pump from the fire blight pathogen *Erwinia amylovora*.  
487 *BMC Microbiol* 2014; **14**: 13.
- 488 36. Murakami S, Nakashima R, Yamashita E et al. Crystal structure of bacterial  
489 multidrug efflux transporter AcrB. *Nature* 2002; **419**: 587-93.
- 490 37. Seeger MA, Schiefner A, Eicher T et al. Structural asymmetry of AcrB trimer  
491 suggests a peristaltic pump mechanism. *Science* 2006; **313**: 1295-8.
- 492 38. Nakashima R, Sakurai K, Yamasaki S et al. Structures of the multidrug  
493 exporter AcrB reveal a proximal multisite drug-binding pocket. *Nature* 2011; **480**:  
494 565-9.
- 495 39. Johnson RM, Fais C, Parmar M et al. Cryo-EM structure and molecular  
496 dynamics analysis of the fluoroquinolone resistant mutant of the AcrB transporter  
497 from *Salmonella*. *Microorganisms* 2020; **8**.
- 498 40. Smith HE, Blair JM. Redundancy in the periplasmic adaptor proteins AcrA and  
499 AcrE provides resilience and an ability to export substrates of multidrug efflux. *J*  
500 *Antimicrob Chemother* 2014; **69**: 982-7.
- 501 41. Zhang CZ, Chang MX, Yang L et al. Upregulation of AcrEF in quinolone  
502 resistance development in *Escherichia coli* when AcrAB-TolC function is impaired.  
503 *Microb Drug Resist* 2018; **24**: 18-23.
- 504
